1        **Shared Nucleotide Flanks Confer Transcriptional Competency to bZip Core Motifs**

2

3

4        Daniel M. Cohen<sup>1,3</sup>, Hee-Woong Lim<sup>2,3</sup>, Kyoung-Jae Won<sup>2,3</sup> and David J. Steger<sup>1,3,\*</sup>

5

6

7        <sup>1</sup>Division of Endocrinology, Diabetes, and Metabolism, Department of Medicine, <sup>2</sup>Department of  
8        Genetics, <sup>3</sup>The Institute for Diabetes, Obesity, and Metabolism, Perelman School of Medicine at the  
9        University of Pennsylvania, Philadelphia, PA 19104

10

11

12        \*Address Correspondence to:

13

David J. Steger, Ph.D.

14

12-103 Smilow Center for Translational Research

15

3400 Civic Center Boulevard, Bldg 421

16

Philadelphia, PA 19104-5160

17

Phone: (215) 746-8520; email: [stegerdj@penmedicine.upenn.edu](mailto:stegerdj@penmedicine.upenn.edu)

18 **ABSTRACT**

19

20 Sequence-specific DNA binding recruits transcription factors (TFs) to the genome to regulate gene  
21 expression. Here, we perform high resolution mapping of CEBP proteins to determine how sequence  
22 dictates genomic occupancy. Surprisingly, the sequence determinants for CEBPs diverge from  
23 classical models. In vivo, CEBPs recognize the fusion of a degenerate and canonical half site, which  
24 is atypical for CEBP homodimers and implies altered DNA specificity through heterodimerization.  
25 Furthermore, the minimum sequence determinants for CEBP binding are encoded by a 10-mer motif  
26 rather than the commonly annotated 8-bp sequence. This extended motif definition is broadly  
27 important. First, motif optimization within the 10-mer is strongly correlated with cell-type-independent  
28 recruitment of CEBP $\beta$ . Second, selection bias at core-motif-flanking nucleotides occurs for multiple  
29 bZip proteins. This study sheds new light on DNA-sequence specificity for bZip proteins, and provides  
30 key insights into how sequence sub-optimization affects genomic occupancy of CEBPs across cell  
31 types.

## 32 INTRODUCTION

33 Sequence-specific DNA binding by transcription factors (TFs) is fundamental to the  
34 establishment and maintenance of gene programs that drive cell function in health and disease  
35 (Deplancke, Alpern, & Gardeux, 2016; Vockley, Barrera, & Reddy, 2017). The genomic distribution of  
36 TFs at enhancers and promoters defines the framework by which these proteins orchestrate temporal  
37 and spatial regulation of gene expression (Shlyueva, Stampfel, & Stark, 2014; Spitz & Furlong, 2012).  
38 The genomic landscape of TF-binding sites (TFBSs) is organized by the non-random distribution of  
39 DNA recognition sequences, or motifs, that mediate recruitment of their cognate TFs. Consequently,  
40 defining the motif preferences employed by each TF and mapping the genomic locations of motifs are  
41 key to unlocking the basis for gene regulatory networks.

42 Sequence preferences of TFs have been interrogated systematically using high-throughput  
43 approaches designed to select TFBSs both in vitro and in vivo (Jolma & Taipale, 2011; Odom, 2011;  
44 Stormo & Zhao, 2010). Protein binding microarrays (PBMs) and high-throughput in vitro selection (HT-  
45 SELEX) have determined the specificities of hundreds of isolated TFs from multiple species (Jolma et  
46 al., 2013; Weirauch et al., 2014). Alternatively, chromatin immunoprecipitation combined with next  
47 generation sequencing (ChIP-seq) has been employed extensively to locate where TFs occupy the  
48 native genome and to interrogate motifs from overrepresented sequences in ChIP-seq peaks. In spite  
49 of the high information content of consensus sequences, in vitro motif logos have limited ability to  
50 predict in vivo binding (Orenstein & Shamir, 2017), perhaps due to relaxed or altered sequence  
51 specificity of TFs in their native environments. While this discrepancy can be ascribed in part to the  
52 limited, 200 base pair (bp) resolution of ChIP-seq that restricts mapping of TFBSs to short motifs,  
53 emerging evidence suggests that altered sequence specificity in cells may be biologically important in  
54 TFBS selection. Recent investigations of contextualizing factors such as DNA structure and protein-  
55 protein interactions have revealed that DNA methylation (Mann et al., 2013; Yin et al., 2017),  
56 neighboring TF interaction (Jolma et al., 2015), and heterodimer formation between related TFs  
57 (Rodríguez-Martínez, Reinke, Bhimsaria, Keating, & Ansari, 2017) can change sequence specificity.

58           Despite these important advances, a causal relationship between the locations of recognition  
59 motifs and TFBSs has proven elusive on a site-by-site basis in the genome. A bottom-up approach of  
60 motif scanning throughout the genome is daunting given that any particular TF binds only a small  
61 fraction of its candidate motifs (Wang et al., 2012), presumably due to the fact that chromatin renders  
62 inaccessible the vast majority of sites. A top-down approach of motif scanning at ChIP-seq peaks is  
63 often confounded by either the absence of a good match to a consensus sequence or the presence of  
64 multiple motif matches, especially for TFs that recognize low-complexity motifs. Fortunately,  
65 experimental advances are beginning to resolve these ambiguities. Identification of DNA sequences  
66 mediating TF recruitment in the genome has been facilitated by the development of ChIP with lambda  
67 exonuclease digestion and sequencing (ChIP-exo) that achieves 20-50 bp resolution of bound sites  
68 (Rhee & Pugh, 2011). Close discrimination of bound motifs can revise and improve recognition  
69 sequences (Iwata et al., 2017; Luna-Zurita et al., 2016) and resolve dimeric versus monomeric  
70 binding (Lim et al., 2015; Starick et al., 2015). In parallel, comparison of bound and unbound motifs in  
71 biochemical assays of TF binding to histone-free genomic DNA is providing further insight into the  
72 native sites that are sufficient to mediate occupancy (Bartlett et al., 2017; Cohen et al., 2015; Gossett  
73 & Lieb, 2008; Guertin, Martins, Siepel, & Lis, 2012). Uniting these approaches has the potential to  
74 bridge major gaps in our understanding of the relationship between TF sequence specificity, motif  
75 occurrence and occupancy of native genomic sites.

76           CEBP TFs are particularly interesting in terms of how DNA-binding specificity defines genomic  
77 occupancy for two key reasons. As lineage determining TFs in several tissues (Costa, Kalinichenko,  
78 Holterman, & Wang, 2003; Friedman, 2002; Rosen et al., 2002; Tsukada, Yoshida, Kominato, &  
79 Auron, 2011), CEBPs may function as pioneer factors that overcome the inhibitory effects of  
80 chromatin, and thus defining their sequence specificity may be instructive as to whether a relationship  
81 exists between binding site affinity and TF occupancy in the genome. In addition, CEBPs can bind  
82 DNA as both homodimers and heterodimers, and their ability to target different sequence motifs  
83 through heterodimerization with other bZip family members (Cohen et al., 2015; Han et al., 2013;

84 Reinke, Baek, Ashenberg, & Keating, 2013; Rodríguez-Martínez et al., 2017) may enable the  
85 utilization of a broad repertoire of motifs to control a variety of gene expression programs. Indeed,  
86 CEBPs occupy tens of thousands of sites in primary cells and tissues (Everett et al., 2013; Heinz et  
87 al., 2010; Schmidt et al., 2010; Wang et al., 2012), however degenerate ChIP-seq motifs obscure the  
88 importance of sequence determinants for binding site selection.

89 Here, we report the high-resolution mapping of CEBP-binding sites in the human and mouse  
90 genomes using ChIP-exo. We find that CEBPs occupy a large repertoire of sequences in vivo that is  
91 anchored by a CEBP half site. The base composition of the degenerate half site at any particular  
92 locus determines homo- versus heterodimer occupancy. While positive selection is important, it is  
93 striking that, the flanking bases directly abutting the core motif also affect occupancy through negative  
94 selection, i.e. the absence of a particular base is more important for binding than the presence of  
95 another. We demonstrate the importance of the CEBP 10-mer motif by identifying an optimal  
96 sequence that is prevalently bound independent of cell type, suggesting that it forms a high-affinity-  
97 binding site that overrides chromatin context. Moreover, natural genetic variation from single  
98 nucleotide polymorphisms (SNPs) that introduce non-permissive flanking bases leads to strain-  
99 specific CEBP occupancy in mice. Intriguingly, the expanded motif definition for CEBP can be  
100 generalized to the broader bZip family, revealing that conserved favorable and unfavorable bases  
101 flanking preferred cores determine genomic occupancy and transcriptional activity.

102

## 103 **RESULTS**

104

105 **CEBP proteins recognize a diversity of genomic sequences through a degenerate half site.** To  
106 identify the genomic sequences targeted by CEBP TFs with high resolution in the native genome, we  
107 performed ChIP-exo in primary human mesenchymal stem cells (hMSCs) for CEBP $\beta$  as well as in  
108 mouse liver tissue for CEBP $\alpha$  and CEBP $\beta$ . The approach uses lambda exonuclease to trim ChIP DNA

109 until a bound protein blocks further enzymatic activity (Mymryk & Archer, 1994). This creates 5'  
110 borders on both DNA strands that are juxtaposed with the protein, manifested as opposite-stranded  
111 peak pairs on a genome browser, and achieves 20-50 bp resolution of DNA binding (Rhee & Pugh,  
112 2011).

113         Opposite-stranded peak pairs annotate both canonical CEBP $\beta$  homodimer motifs and CEBP $\beta$ -  
114 sequences bound by the ATF4 heterodimer in hMSCs, demonstrating the resolving power of ChIP-  
115 exo (Figure 1A). Globally, CEBP peak pairs show an average distance distribution of 15-30 bp, with a  
116 predominant distance of 25 bp for CEBP $\beta$  and 27 bp for CEBP $\alpha$  (Figure 1B, Figure 1-figure  
117 supplement 1A). Motif analysis reveals exclusive enrichment of an 8-mer-core sequence comprised of  
118 a degenerate half site (TKnn) fused to a CEBP half site (GCAA) (Figure 1C, Figure 1-figure  
119 supplement 1B). Ordered peak pairs flank this motif at a majority of ChIP-seq peaks (Figure 1D,  
120 Figure 1-figure supplement 1C), indicating that CEBPs occupy the genome primarily through direct,  
121 sequence-specific interaction. Parsing the CEBP cistrome by individual 8-mer variants of the CEBP  
122 core motif reveals that the sequence bound most frequently by CEBP $\beta$  and CEBP $\alpha$  is TTGTGCAA  
123 (Figure 1E), partly due to its high occurrence in the genome (Figure 1-figure supplement 1D).  
124 Nevertheless, this sequence accounts for only about 14% of high-confidence ChIP-exo-annotated  
125 binding sites. Taken together with similar ChIP-seq occupancy strengths observed as a function of  
126 CEBP 8-mers (Figure 1-figure supplement 1E), these data indicate that no singular sequence explains  
127 the majority of CEBP binding. Interestingly, the CEBP $\beta$ -ATF4 heterodimer sequence, TGATGCAA, is  
128 the second most prevalent CEBP core motif variant, and additional hybrid motifs composed of non-  
129 CEBP bZip half sites (TGWN) joined to the CEBP half site are also present within the top-ranked  
130 sequences. The tolerance of substituting G in lieu of the canonical T at the 2nd position of the hybrid  
131 core suggests either an intrinsic relaxation of CEBP's sequence specificity in physiological contexts,  
132 broadened motif recognition through heterodimerization, or both. As a whole, the ChIP-exo data

133 demonstrate conservation between human and mouse CEBP family members through interaction with  
134 a compound motif anchored by a CEBP half site.

135         The CEBP motif identified in primary cells and tissue differs strikingly from the optimal  
136 sequence observed for homodimers in vitro. Both early studies (Agre, Johnson, & McKnight, 1989)  
137 and more recent systematic biochemical approaches (Isakova et al., 2017; Jolma et al., 2013;  
138 Weirauch et al., 2014) report that the CEBP homodimer binds a palindromic motif formed by the  
139 fusion of two CEBP half sites (TTGCGCAA). Whether expanded sequence recognition by  
140 heterodimers (Cohen et al., 2015; Han et al., 2013; Rodríguez-Martínez et al., 2017) is sufficient to  
141 explain the discrepancies between homodimeric versus endogenous CEBP binding is unclear given  
142 that in vitro (PBM, HT-SELEX, SMiLE-Seq) and in vivo (ChIP-exo) assays have technical differences.  
143 To remove bias introduced by assay-dependent effects, we performed ChIP-exo utilizing recombinant  
144 CEBP $\beta$  homodimer or ATF4-CEBP $\beta$  heterodimer and protein-free genomic DNA. A sequence  
145 resembling the palindromic CEBP motif is enriched at peak pairs for the CEBP $\beta$  homodimer (Figure  
146 1F), consistent with findings from PBMs (Weirauch et al., 2014), HT-SELEX (Jolma et al., 2013) and  
147 SMiLE-seq (Isakova et al., 2017). Yet, this motif is distinct from the consensus motif for endogenous  
148 CEBP. In contrast, in vitro ChIP-exo for the CEBP $\beta$ -ATF4 heterodimer yields a motif that is very  
149 similar to that reported for ATF4 in hMSCs (Figure 1F) (Cohen et al., 2015). Sequence-specific  
150 interaction by the CEBP $\beta$  homo- and heterodimer is indicated by the emergence of peak pairs with  
151 fixed spacing that flank both motifs (Figure 1-figure supplement 1F,G). Thus, in vitro ChIP-exo  
152 corroborates the DNA sequence specificity reported by established biochemical approaches, and  
153 confirms that heterodimer formation with ATF4 alters the specificity of CEBP $\beta$ . More broadly, the data  
154 illustrate a fundamental, assay-independent difference between the DNA-binding specificity of the  
155 CEBP $\beta$  homodimer versus CEBP $\beta$  in cells. Given the relatively high frequency of CEBP $\beta$  occupancy  
156 at hybrid sequences comprised of AP-1 or ATF-like half sites fused to a CEBP half site, it seems likely

157 that heterodimerization with other bZip family members is a major contributor to the broadened motif  
158 repertoire recognized by CEBPs in vivo.

159

160 **Sequence optimization regulates cell-type-specific binding by CEBP $\beta$ .** The observation that  
161 CEBP $\beta$  utilizes a similar sequence repertoire in hMSCs and mouse liver raises the question of  
162 whether particular 8-mers affect cell-type-specific recruitment. To gain further insight into a  
163 relationship between DNA sequence and cell-type-specific binding by CEBP $\beta$ , we classified high-  
164 confidence, ChIP-exo-annotated CEBP $\beta$  sites according to their co-occupancy in 6 different cell lines  
165 profiled for CEBP $\beta$  binding by the ENCODE consortium (Figure 2A). Consistent with frequency  
166 measurements for shared versus unique binding sites for a TF in different cell types (Gertz et al.,  
167 2013; John et al., 2011), approximately 10-15% of bound CEBP motifs map to either hMSCs-specific  
168 or cell-type-independent peaks, while the remaining 70-80% fall between these extremes. The hMSC-  
169 specific and cell-type-independent sites exhibit distinct gene ontologies, suggesting separate  
170 biological functions. Genes associated with biological processes characteristic of hMSC differentiation  
171 and mesenchymal traits are enriched near hMSC-specific sites, whereas genes with more general  
172 roles in the control of transcription and translation reside nearby cell-type-independent sites.  
173 Interestingly, CEBP $\beta$ -binding strength in hMSCs scales in concert with the number of cell types  
174 associated with a bound site (Figure 2B), revealing that the cell-type-independent sites are associated  
175 with a genomic context that is more favorable for CEBP $\beta$  occupancy. To test whether CEBP  
176 sequence varies with cell-type-dependent binding, we generated consensus position weight matrices  
177 based on our ChIP-exo data for hMSC-specific or cell-type-independent sites (Figure 2C). For both  
178 homodimer and heterodimer-like consensus motifs, we observe a pronounced enrichment for C in the  
179 5<sup>th</sup> position of the motif at cell-type-independent sites versus hMSC-specific sites. This C adheres to  
180 the canonical CEBP half site, revealing that cell-type-independent sites have optimized 8-mers  
181 relative to their counterparts at hMSC-specific sites. Since both homodimer and heterodimer-like



182 motifs share a bias for C at position 5, we infer that this sequence preference is conserved between  
183 CEBP $\beta$  and its heterodimer partners. Parsing ubiquitous and selective CEBP $\beta$  sites by individual core  
184 8-mers illustrates the association of C within the first half site of cell-type-independent sites, and  
185 reveals the specific sequences that are widely bound across cell types (Figure 2D). The motif-centric  
186 perspective also highlights the elite behavior of the CEBP palindrome, which exhibits the strongest  
187 predilection for cell-type-specific binding such that 60% or more of its bound locations are shared  
188 across all cells and 90% or more are bound in at least 5 cell types. These data demonstrate that high-  
189 affinity motifs can recruit CEBP homodimers and heterodimers independent of cell type or chromatin  
190 structure. Substitution of other bases in lieu of C at the 5<sup>th</sup> position of the CEBP motif is tolerated, but  
191 it yields a suboptimal motif that is bound in a contingent manner, likely attributable to the inherent  
192 differences in chromatin structure across cell types (Yue et al., 2014). Together, these data suggest  
193 that CEBP $\beta$  may play a pioneering role by overcoming chromatin-mediated repression at high-affinity  
194 motifs but not at suboptimal sequences.

195

196 **Bases directly abutting the core CEBP motif impact occupancy.** The palindromic motif is superior  
197 to all other CEBP motifs for recruitment of CEBPs to the genome. Palindromic CEBP motifs are bound  
198 at the highest rate relative to genomic frequency (Figure 1-figure supplement 1D), and sites that are  
199 competent for binding have the highest probability of being occupied in multiple cell types (Figure 2D).  
200 And yet, most palindromic 8-mers are unoccupied in hMSCs (Figure 1-figure supplement 1D),  
201 suggesting that two CEBP half sites comprising a high-affinity sequence for CEBP homodimers is not  
202 sufficient to mediate occupancy throughout the genome. To test this, we profiled CEBP $\beta$  occupancy at  
203 every palindromic motif in the human genome, excluding unplaced contigs, using our in vitro ChIP-exo  
204 data generated with purified CEBP $\beta$  and histone-free genomic DNA. While the vast majority (84%) of  
205 CEBP palindromes showed binding, a subset failed to recruit CEBP $\beta$ . Sequence alignments of these  
206 unbound regions revealed a pronounced difference in the nucleotide composition of positions

207 immediately flanking the palindromic 8-mer (Figure 3A). In contrast, neighboring bases extending  
208 beyond these flanks are randomly associated (Figure 3-figure supplement 1A). Strikingly, the  
209 occurrence of T at the 5' flank or A at the 3' flank is negatively correlated with CEBP $\beta$  occupancy.  
210 Moreover, while C is also disfavored at the 5' flank, its ability to cripple the functionality of the  
211 palindromic 8-mer is most pronounced when paired with A at the 3' flank. Likewise, T-G dinucleotide  
212 flanks appear highly deleterious to CEBP $\beta$  binding (note that **CTTGCGCAA** and **TTTGCGCAAG** are  
213 reverse-complementary 10-mer sequences). Indeed, the sequence biases at the flanking positions  
214 are implicit within the motif logos from our ChIP-exo experiments (Figure 1C, Figure 1-figure  
215 supplement 1B), which, if inspected carefully, reveal the exclusion of T at the 5' flank and A at the 3'  
216 flank. However, compared to the core 8-mer, the relatively lower information content encoded in these  
217 flanks de-emphasizes their importance in the motif logos, and fails to underscore how specific base  
218 pairings at the 5' and 3' flanks (T-A, C-A, T-G) can override recruitment of CEBP $\beta$  to an optimized 8-  
219 mer core sequence.

220 This observation that flanking nucleotides affect CEBP $\beta$  occupancy suggests that the minimal  
221 CEBP motif is functionally a 10-mer sequence. Furthermore, it follows that the added specificity  
222 constraints encoded by these flanks would influence CEBP occupancy in vivo. To explore this  
223 possibility, we examined the occupancy of all 3121 palindromic sites as measured by ChIP-seq for  
224 CEBP $\beta$  across 6 different cell lines profiled by the ENCODE consortium in combination with our  
225 hMSC dataset (Figure 3B). Remarkably, we observe that for the top-5 ranked 10-mer sequences,  
226 CEBP $\beta$  is commonly bound across 5 or more cell types at the vast majority of sites (63-83%, red  
227 bars), and occupancy is observed at  $\geq 95\%$  of sites in at least one cell type (sum of red and green  
228 bars). Conversely, for 10-mers that contain unfavorable flanks, occupancy is rarely observed in cells,  
229 and those sites that are occupied are not shared amongst multiple cell types. These data indicate that  
230 flanking nucleotides influence binding to the canonical palindromic CEBP motif in the native genome.  
231 Moreover, they reveal that when defined correctly as a 10-mer, CEBP motif candidates predict

232 genomic occupancy with reasonable accuracy without any prior knowledge of cell type or chromatin  
233 structure. In contrast, 8-mer palindromic sequences with neutral flanking dinucleotide pairs  
234 (combinations of one favorable and one unfavorable flanking nucleotide at the 5' and 3' positions) are  
235 enriched for cell-type-dependent CEBP $\beta$  binding, suggesting that while these sequences have the  
236 potential to recruit CEBPs, they are more sensitive to cell-type specific differences in chromatin  
237 structure. Reduced affinity for these sequences could explain this behavior, which is indicated by  
238 weaker ChIP-exo signal at sites with neutral flanking bases relative to those with favorable flanks  
239 (Figure 3-figure supplement 1B).

240 While these observations enhance our understanding of the optimal CEBP homodimer motif,  
241 an important question is whether flanking nucleotides influence the broader CEBP cistrome by  
242 affecting binding at core motifs that diverge from the canonical CEBP palindrome. To address this  
243 question, we mined our CEBP $\beta$  hMSC ChIP-exo dataset to see if the flanks could correctly predict  
244 real (ChIP-exo annotated) versus decoy (unbound) candidates for CEBP-binding sites. Specifically,  
245 we mapped frequently bound 8-mers (see Figure 1E) that reside in the open chromatin of high-  
246 confidence, ChIP-exo-annotated CEBP $\beta$ -binding sites (Figure 3C). This analysis detected 3686  
247 candidate 8-mers, or secondary motifs, in the vicinity of a known primary CEBP-binding site. These  
248 sites were then classified into bound and unbound based on enrichment for ChIP-exo reads (Figure 3-  
249 figure supplement 1C). Within the set of candidate secondary motifs, 61% lacked prominent spaced  
250 opposite-stranded peak pairs, indicating little or no occupancy. We then examined the frequency of  
251 dinucleotide flanks abutting the primary CEBP 8-mer as well as the bound and unbound secondary 8-  
252 mers (Figure 3D). Consistent with our ChIP-exo motif logos and analyses of the palindromic 8-mer,  
253 the primary sites are enriched for A-T, A-C, A-G, G-T, G-C, and C-T dinucleotide flanks, whereas the  
254 unfavorable T-A, C-A, and T-G flanks are essentially absent. This frequency distribution differs from  
255 the background rate for CEBP 8-mers across the human genome (Figure 3-figure supplement 1D),  
256 such that favorable flanks occur less frequently than expected by chance. Remarkably, weakly bound

257 secondary motifs show a preference for favorable flanks that is similar to primary sites, albeit at lower  
258 frequencies. In contrast, the unbound 8-mers are enriched for unfavorable and neutral flanks. These  
259 data demonstrate that flanking bases play a role in discriminating which candidate CEBP 8-mers are  
260 bound within regions of open chromatin. Combined with the earlier analyses, they reveal a 10-mer  
261 sequence as the minimal CEBP recognition motif.

262

263 **Bases directly abutting core bZip motifs affect transcriptional activity.** The aforementioned  
264 ChIP-exo studies establish genome-wide trends between CEBP occupancy and the flanking bases for  
265 the CEBP core 8-mer motif. To directly address whether a change in the flanks is sufficient to render a  
266 change in CEBP binding, we performed ChIP for CEBPs in liver tissue isolated from C57BL/6J (B6)  
267 and 129S1/SvImJ (129) mice, and examined occupancy at sites carrying SNPs that introduce  
268 unfavorable flanks into CEBP-binding sites when comparing B6 to 129. While only two sites exist  
269 meeting the constraints of SNP location relative to the CEBP core 8-mer, the type of nucleotide  
270 substitution of interest, and the absence of a neighboring CEBP-binding site, both show diminished  
271 occupancy of CEBP $\alpha$  and CEBP $\beta$  in 129 mice relative to B6 (Figure 4A). Consistent with these  
272 results, B6x129 F1 mice showed significantly skewed binding of CEBPs to the B6 alleles (Figure 4B).  
273 Because the B6 and 129 alleles reside in the same nuclei of F1 mice and are thus exposed to the  
274 same trans-acting factors, these data demonstrate that cis effects determine differential binding of  
275 CEBPs at these loci. Specifically, the introduction of unfavorable flanking nucleotides may be  
276 sufficient to impair CEBP binding independently of the core 8-mer.

277 More broadly, we sought to determine whether the influence of flanking bases is specific to  
278 CEBPs or a more general feature of the bZip family of TFs. A general role for flanking bases in  
279 sequence recognition by bZip TFs is supported by the motifs enriched in previously published ChIP-  
280 seq datasets for AP-1, CREB and NFIL3 (Mei et al., 2017). Each reveals a clear exclusion of T and A  
281 in the 5' and 3' flanking positions, respectively (Figure 4C). To test this relationship and extend its  
282 relevance to transcriptional activity, we examined the activity of synthetic luciferase reporters

283 containing multimerized core motifs for distinct bZip TFs flanked by either favorable or unfavorable  
284 bases. Replacement of favorable with unfavorable flanks decreased luciferase activity across all bZip  
285 reporter constructs tested, with reductions ranging from 6-fold for the CEBP motif to  $\geq$  10-fold for the  
286 remaining motifs (Figure 4D). Thus, the data reveal a shared requirement across the bZIP family for  
287 favorable motif flanks that confer binding and transcriptional competency to their cognate core  
288 recognition sequences.

289

## 290 **DISCUSSION**

291 Our ChIP-exo data resolve species-conserved sequence requirements for the recruitment of  
292 CEBP proteins to the native genome. Consistent with in vitro data obtained from PBMs (Weirauch et  
293 al., 2014), HT-SELEX (Jolma et al., 2013) and SMiLE-seq (Isakova et al., 2017), the CEBP  
294 homodimer exhibits a strong preference for palindromic or near-palindromic motifs, comprised of two  
295 abutting half sites of VTTRC, that occur rarely in mammalian genomes. In contrast, CEBPs employ an  
296 expanded repertoire of recognition sequences in vivo characterized by the fusion of degenerate and  
297 canonical CEBP half sites to yield a 10-mer-consensus motif of VTKNNGCAAB. This enables CEBPs  
298 to populate large cistromes comprised of tens of thousands of binding sites in mammalian tissues and  
299 primary cells (Everett et al., 2013; Heinz et al., 2010; Schmidt et al., 2010; Wang et al., 2012).

300 It is noteworthy that roughly a third of CEBP-binding sites contain a G at the third position of  
301 the 10-mer, creating a preferred half-site motif for the ATF, AP-1, and CREB families of TFs.  
302 Extensive evidence has been found for the heterodimerization and altered sequence specificity of  
303 CEBP-ATF complexes compared to their homodimer counterparts (Cohen et al., 2015; Han et al.,  
304 2013; Reinke et al., 2013; Rodríguez-Martínez et al., 2017). An intriguing question is whether  
305 interfamily bZip heterodimerization is broadly important for directing CEBPs to genomic loci with  
306 VTGNNNGCAAB motifs. Though our current study can only infer that heterodimerization contributes to  
307 the genomic recruitment of CEBPs, it does unambiguously demonstrate that a large majority of  
308 binding sites, 70-90% depending on threshold cutoffs, contains bound CEBP motifs. This suggests

309 that CEBPs primarily occupy the genome through direct, sequence-specific interaction. Moreover,  
310 binding to motifs with atypical spacing between half sites (Rodríguez-Martínez et al., 2017) or to other  
311 DNA-bound TFs through tethering contribute minimally to the genomic recruitment of CEBPs.

312 Rather than simply examining enrichment of overrepresented sequences within CEBP-binding  
313 sites, ChIP-exo enables a genome-wide cataloging of motif utilization within the CEBP cistrome.  
314 Moreover, in contrast to in vitro methods interrogating sequence-specific binding, ChIP-exo preserves  
315 genomic information that affords important comparisons between bound and unbound sites within and  
316 across cell types. Harnessing these strengths, we demonstrate that elite CEBP 10-mer motifs  
317 comprised of RTTRCGCAAY recruit CEBP $\beta$  in a cell-type-independent manner. Moreover, for  
318 optimized CEBP 10-mers containing a palindromic core, approximately 80% of genomic instances are  
319 bound by CEBP $\beta$ . Thus, highly optimized CEBP motifs are sufficient to recruit CEBP $\beta$  regardless of  
320 the genomic context, implying that CEBPs can overcome chromatin-mediated repression to access  
321 high-affinity sites. In parallel, direct examination of unbound TTGCGCAA motifs reveal flanking bases  
322 that are disfavored for CEBP $\beta$  binding. Pronounced negative selection against unfavorable flanks  
323 suggests that these positions contribute to motif recognition by modulating DNA-binding affinity.

324 Comparison of bound versus unbound motifs is often excluded from analyses of high-  
325 throughput assays interrogating motif preferences of TFs, yet it provides a powerful lens to uncover  
326 additional determinants of DNA-binding specificity. By anchoring on CEBP palindromes and  
327 examining genomic occupancy as a function of cell type, we further classified a third group of flanks  
328 as neutral. Neutral flanks pair a favorable and unfavorable base at the first and last position of the  
329 10mer, and they are correlated with a progressive loss of palindromic occupancy across cell types  
330 and weaker binding strengths in vitro. Importantly, these relationships between flanking sequence and  
331 motif occupancy can be generalized to the more degenerate CEBP motif. Comparison of bound  
332 versus unbound sequences at secondary CEBP motifs that occur in the vicinity of strong primary-  
333 binding sites reveals enrichment for neutral flanks at bound secondary motifs relative to primary sites.

334 This suggests that CEBPs can populate low-affinity sequences that reside in open chromatin. In  
335 contrast, secondary motifs that have unfavorable flanks are rarely bound.

336 The deeper understanding of the CEBP motif as a 10-mer sequence comprised of a core 8-  
337 mer with tunable binding strength controlled by the nucleotide flanks has profound implications for  
338 understanding the relationships between motif occurrence, DNA-binding affinity, and genomic  
339 occupancy. Optimal flanks are observed at only 25-30% of candidate VTKNNGCAAB 10-mers in the  
340 human genome, compared to 37.5% if all flanks have equal probability of occurrence. Optimized  
341 sequences incorporating a palindromic core are extremely rare, totaling 934 sites or 0.2% of  
342 candidate 10-mers with optimized flanks. Neutral flanks are present at approximately 50% of the  
343 candidate CEBP 10-mers across the genome, revealing a large sequence space for regulated binding  
344 by tissue-specific DNA accessibility. Finally, unfavorable flanks could explain why many  
345 computationally predicted motifs are rarely bound in any cell type or tissue (Wang et al., 2012).

346 It is striking that the majority of the CEBP cistrome is populated by motifs that are sub-  
347 optimized in the core 8-mer, the flanking bases or both, and that these motifs display narrow  
348 occupancy across cell types. This relationship is reminiscent of the sub-optimization of motifs reported  
349 for cell-type-dependent binding of ER $\alpha$  (Gertz et al., 2013; Joseph et al., 2010). Intriguingly, high-  
350 throughput transcriptional screens in *Drosophila* have demonstrated a genetic bias towards motif sub-  
351 optimization at developmentally-regulated enhancers (Farley et al., 2015). Placed in the context of our  
352 work, perhaps the rarity of fully optimized TF motifs in eukaryotic genomes serves to limit constitutive  
353 genomic recruitment, suppressing the potential for TFs to trigger unregulated gene expression with  
354 regard to tissue or cell type.

355 Moreover, our findings may have broad impact on the understanding of DNA-binding  
356 specificity for bZip proteins in general. Core motifs for ATF4, AP-1, CREB and PAR are also de-  
357 enriched for T-A flanks that cripple their ability to promote transcription. While negative selection at  
358 the flanks appears to be a conserved feature of bZip motifs, a thermodynamic basis for this  
359 observation is currently lacking. Crystallography studies of several bZip-DNA complexes, including the



360 CEBP $\alpha$  DNA-binding domain (Ellenberger, Brandl, Struhl, & Harrison, 1992; Fujii, Shimizu, Toda,  
361 Yanagida, & Hakoshima, 2000; Glover & Harrison, 1995; Miller, Shuman, Sebastian, Dauter, &  
362 Johnson, 2003; Schumacher, Goodman, & Brennan, 2000), have modeled binding to short DNA  
363 duplexes of about 20 bp. Given that the apparent footprint of CEBP by ChIP-exo is approximately 25  
364 bp, it is possible that protein-DNA interactions outside of the core 8-mer may have been missed due  
365 to the short and flexible nature of oligonucleotide duplexes. Unlike positive selection within the core 8-  
366 mer, negative selection at the flanks may be detected by contacts between bZip proteins and the DNA  
367 backbone at these positions. Consistent with this hypothesis, it has been suggested that motif flanks  
368 regulate genomic occupancy of E-box TFs through alteration of DNA shape (Gordân et al., 2013).  
369 However, given that shape parameters are computed from the underlying DNA sequence, it is difficult  
370 to experimentally uncouple DNA sequence from DNA shape at the resolution of a single position in  
371 the context of binding assays such as ChIP-seq or ChIP-exo. Rather, structural analyses of bZip-DNA  
372 complexes using longer DNA templates and comparing motifs with optimized versus sub-optimized  
373 flanks will likely be necessary to explain how flanking nucleotides influence motif recognition by bZip  
374 TFs.

375

## 376 **MATERIALS AND METHODS**

377

378 **Animal Care and Cell Culture:** Animal experiments were reviewed and approved by the Institutional  
379 Animal Care and Use Committees of the University of Pennsylvania. Mice were kept under  
380 standardized conditions with water and food *ad libitum* in a pathogen-free animal facility. hMSCs were  
381 obtained from Lonza and maintained in low glucose Dulbecco's modified Eagle's medium  
382 supplemented with 10% fetal bovine serum and 2mM glutamine. hMSCs were used at passages 4  
383 through 7.

384



385 **ChIP and ChIP-exo:** The following antibodies were used: CEBP $\alpha$  (sc-61, Santa Cruz), CEBP $\beta$  (sc-  
386 150, Santa Cruz), ATF4 (sc-200, Santa Cruz) and normal IgG (2729, Cell Signaling). ChIP in mouse  
387 liver was performed with a minimum of 3 individual mice per genotype. Primers for human and mouse  
388 ChIP are reported in Table S1.

389 An Illumina-based ChIP-exo method (Serandour, Brown, Cohen, & Carroll, 2013) was performed  
390 with mouse liver and hMSCs. ChIP-exo in hMSCs was performed using approximately 7 million cells.  
391 ChIP-exo performed in vitro used binding conditions described previously for an in vitro cistromics  
392 assay modeled after ChIP-seq (Cohen et al., 2015). Binding reactions (100  $\mu$ l) were treated with 1%  
393 formaldehyde for 1 min at room temperature, quenched with 125 mM glycine for 5 min, and brought to  
394 1 ml with binding buffer lacking DTT for immunoprecipitation. ATF4 and CEBP $\beta$  were expressed in  
395 BL21(DE3) *Escherichia coli* from pET30a vectors carrying an N-terminal His Tag and full-length  
396 cDNAs. Proteins were purified by Co<sup>2+</sup> affinity chromatography and quantified by comparison with a  
397 BSA standard after SDS-PAGE. Approximately 25  $\mu$ M ATF4 and/or 600 nM CEBP $\beta$  were present in  
398 the initial binding reaction of 100  $\mu$ l. Library preparation was performed similarly to ChIP-exo with cells  
399 or tissue.

400 ChIP-exo data processing including initial peak calling of putative flanking borders and cross-  
401 correlation analysis of opposite-stranded peak pairs was performed as described previously (Lim et  
402 al., 2015). Biological replicates were performed for each liver and hMCS experiment, and peak pairs  
403 were scored as positive if called in each replicate, while downstream analyses utilized pooled data  
404 from both replicates. De novo motif search was performed within 50 bp windows from the top-1000  
405 sites showing 15-30 bp spacing between opposite-stranded peak pairs using MEME-ChIP (Machanick  
406 & Bailey, 2011). Motif visualization emphasizing de-enriched bases was performed with REDUCE  
407 (Roven & Bussemaker, 2003). ChIP-exo signal was visualized after scanning anchoring regions with  
408 the de novo motif PWM and identifying the site with maximum score in each region. Peaks from  
409 matching ChIP-seq data (Bauer et al., 2015; Cohen et al., 2015) served as anchoring regions for

410 ChIP-exo experiments performed with tissue or cells. For in vitro ChIP-exo studies, opposite-stranded  
411 peak pairs of 15-30 bp were pooled, merged and extended to a 50 bp window.

412 **Co-occupancy in ENCODE datasets:** ENCODE peak calls (narrowPeak) for CEBP $\beta$  binding  
413 from 6 cell lines (A549, H1esc, HeLaS3, HepG2, IMR90, K562) were pooled with 300bp ChIP-seq calls  
414 for CEBP $\beta$  in hMSCs stimulated with DMI for 24 hours. Co-bound CEBP $\beta$  peaks were defined as  
415 having at least 50bp overlap across cell types and each ChIP-seq peak scored for cell-type specific  
416 binding using Galaxy Tools suite available at [cistrome.org/ap](http://cistrome.org/ap). High confidence ChIP exo-bound motifs  
417 were assigned the cell-type specific binding score of their corresponding ChIP-seq peak. Co-  
418 occupancy of CEBP $\beta$  binding sites with other TFs was assessed using the peak calls in the  
419 wgEncodeRegTfbsClusteredV3 supertrack, filtered to exclude contributions to co-occupancy from  
420 CEBP $\beta$ , CEBP $\delta$ , RNA polymerase II, or RNA polymerase III.

421 **Analysis of secondary candidate CEBP motifs:** We mapped candidate 8-mers that  
422 matched the sequence any of the top 13 occupied CEBP sequences (see Figure 1E) in the hg19  
423 genome using HOMER. Candidate 8-mers that occurred within an 11-200bp window adjacent to a  
424 high confidence CEBP ChIP exo-bound (primary) site were included in the analyses in Figure 3C/D.  
425 ChIP exo-bound secondary sites were defined as having either a positive or negative peak pair  
426 exceeding 0.1 RPM read count and a summed RPM score of 0.15 RPM or greater. Heatmaps in  
427 Figure S3C were ordered based on decreasing RPM exo strength (sum of positive and negative exo  
428 peak pair) at the secondary 8-mer sequence. Heatmaps visualizations were generated in Treeview.  
429 Polar bar graphs of flanking nucleotide pair frequency were generated using R.

430

431 **Luciferase Reporter Assays:** Synthetic bZip reporters were comprised of four repeats of each motif,  
432 separated by identical 18 bp spacer sequences. Unique flanking 5' and 3' extensions were added as  
433 PCR anchor points. Reporter cassettes totaled 163 bp or 159 bp for 10 bp or 9 bp bZip motifs,  
434 respectively. DNA cassettes were purchased as Ultramers from IDT, PCR amplified, and subcloned

435 into the pGL4.24 vector using XhoI and BglII sites. Sequence for each multimerized motif is available  
436 in Table S1. Sanger sequencing verified all plasmids. HEK293T were co-transfected with 320 ng of  
437 luciferase reporter construct, 40 ng of CMV-Renilla plasmid, and 40 ng of pCDNA3.1 or pCDNA3.1-  
438 Cebpb, using 1.2  $\mu$ l of Lipofectamine 2000 (Life Technologies) per well, in a reverse transfection  
439 protocol using 24 well plates. Cells were lysed in passive lysis buffer either 24 hours (CRE reporter) or  
440 48 hours (all other reporters) post-transfection. Relative luminescence (Firefly to Renilla ratio) was  
441 determined on a Biotek Synergy H1 microplate reader. Samples were assayed in a minimum of  
442 triplicates per biological condition.

443

444 **Pyrosequencing:** DNA (5% of ChIP samples or 0.5% of input DNA) was amplified by PCR using  
445 Phusion polymerase (NEB), a biotinylated forward primer designed using the PyroMark Assay Design  
446 software (Qiagen), and the reverse primer employed for ChIP-qPCR (see Table S1). A total of 37  
447 amplification cycles was used. PCR amplified ChIP DNA was gel isolated and purified using ChIP  
448 DNA Clean & Concentrate columns and eluted in 15 $\mu$ L of water. 3 $\mu$ L of biotinylated PCR products  
449 was used per pyrosequencing reaction. Pyrosequencing was performed on a PyroMark Q96 MD  
450 instrument using the PyroMark Gold reagents per the manufacturer's instructions (Qiagen).

451

## 452 **ACKNOWLEDGMENTS**

453 We are grateful to Raymond Soccio for guidance on the experimental strategy interrogating  
454 strain-specific TF binding, and for providing liver tissue from 129S1/SvImJ and  
455 129S1/SvImJxC57BL/6J F1 mice. We also thank Chris Krapp and Marisa Bartolomei for help with  
456 pyrosequencing and generously providing access to their sequencer. We are indebted to members of  
457 the Lazar laboratory for insightful discussions, and also thank the Functional Genomics Core of the  
458 Penn Diabetes Center (DK19525) for deep sequencing. This work was supported by NIH grants R01  
459 DK106027 (to K-JW) and R01 DK098542 (to DJS).

460

461 **COMPETING INTERESTS**

462 We have none to report.

463 **REFERENCES**

464

465 Agre, P., Johnson, P. F., & McKnight, S. L. (1989). Cognate DNA binding specificity retained after

466 leucine zipper exchange between GCN4 and C/EBP. *Science (New York, N.Y.)*, 246(4932),

467 922–926.

468 Bartlett, A., O'Malley, R. C., Huang, S.-S. C., Galli, M., Nery, J. R., Gallavotti, A., & Ecker, J. R.

469 (2017). Mapping genome-wide transcription-factor binding sites using DAP-seq. *Nature*

470 *Protocols*, 12(8), 1659–1672. <https://doi.org/10.1038/nprot.2017.055>

471 Bauer, R. C., Sasaki, M., Cohen, D. M., Cui, J., Smith, M. A., Yenilmez, B. O., ... Rader, D. J. (2015).

472 Tribbles-1 regulates hepatic lipogenesis through posttranscriptional regulation of C/EBP $\alpha$ . *The*

473 *Journal of Clinical Investigation*, 125(10), 3809–3818. <https://doi.org/10.1172/JCI77095>

474 Cohen, D. M., Won, K.-J., Nguyen, N., Lazar, M. A., Chen, C. S., & Steger, D. J. (2015). ATF4

475 licenses C/EBP $\beta$  activity in human mesenchymal stem cells primed for adipogenesis. *ELife*, 4,

476 e06821. <https://doi.org/10.7554/eLife.06821>

477 Costa, R. H., Kalinichenko, V. V., Holterman, A.-X. L., & Wang, X. (2003). Transcription factors in liver

478 development, differentiation, and regeneration. *Hepatology (Baltimore, Md.)*, 38(6), 1331–

479 1347. <https://doi.org/10.1016/j.hep.2003.09.034>

480 Deplancke, B., Alpern, D., & Gardeux, V. (2016). The Genetics of Transcription Factor DNA Binding

481 Variation. *Cell*, 166(3), 538–554. <https://doi.org/10.1016/j.cell.2016.07.012>

482 Ellenberger, T. E., Brandl, C. J., Struhl, K., & Harrison, S. C. (1992). The GCN4 basic region leucine

483 zipper binds DNA as a dimer of uninterrupted alpha helices: crystal structure of the protein-

484 DNA complex. *Cell*, 71(7), 1223–1237.

485 Everett, L. J., Le Lay, J., Lukovac, S., Bernstein, D., Steger, D. J., Lazar, M. A., & Kaestner, K. H.

486 (2013). Integrative genomic analysis of CREB defines a critical role for transcription factor

- 487 networks in mediating the fed/fasted switch in liver. *BMC Genomics*, 14, 337.  
488 <https://doi.org/10.1186/1471-2164-14-337>
- 489 Farley, E. K., Olson, K. M., Zhang, W., Brandt, A. J., Rokhsar, D. S., & Levine, M. S. (2015).  
490 Suboptimization of developmental enhancers. *Science (New York, N.Y.)*, 350(6258), 325–328.  
491 <https://doi.org/10.1126/science.aac6948>
- 492 Friedman, A. D. (2002). Transcriptional regulation of granulocyte and monocyte development.  
493 *Oncogene*, 21(21), 3377–3390. <https://doi.org/10.1038/sj.onc.1205324>
- 494 Fujii, Y., Shimizu, T., Toda, T., Yanagida, M., & Hakoshima, T. (2000). Structural basis for the  
495 diversity of DNA recognition by bZIP transcription factors. *Nature Structural Biology*, 7(10),  
496 889–893. <https://doi.org/10.1038/82822>
- 497 Gertz, J., Savic, D., Varley, K. E., Partridge, E. C., Safi, A., Jain, P., ... Myers, R. M. (2013). Distinct  
498 properties of cell-type-specific and shared transcription factor binding sites. *Molecular Cell*,  
499 52(1), 25–36. <https://doi.org/10.1016/j.molcel.2013.08.037>
- 500 Glover, J. N., & Harrison, S. C. (1995). Crystal structure of the heterodimeric bZIP transcription factor  
501 c-Fos-c-Jun bound to DNA. *Nature*, 373(6511), 257–261. <https://doi.org/10.1038/373257a0>
- 502 Gordân, R., Shen, N., Dror, I., Zhou, T., Horton, J., Rohs, R., & Bulyk, M. L. (2013). Genomic regions  
503 flanking E-box binding sites influence DNA binding specificity of bHLH transcription factors  
504 through DNA shape. *Cell Reports*, 3(4), 1093–1104.  
505 <https://doi.org/10.1016/j.celrep.2013.03.014>
- 506 Gossett, A. J., & Lieb, J. D. (2008). DNA Immunoprecipitation (DIP) for the Determination of DNA-  
507 Binding Specificity. *CSH Protocols*, 2008, pdb.prot4972.
- 508 Guertin, M. J., Martins, A. L., Siepel, A., & Lis, J. T. (2012). Accurate prediction of inducible  
509 transcription factor binding intensities in vivo. *PLoS Genetics*, 8(3), e1002610.  
510 <https://doi.org/10.1371/journal.pgen.1002610>

- 511 Han, J., Back, S. H., Hur, J., Lin, Y.-H., Gildersleeve, R., Shan, J., ... Kaufman, R. J. (2013). ER-  
512 stress-induced transcriptional regulation increases protein synthesis leading to cell death.  
513 *Nature Cell Biology*, 15(5), 481–490. <https://doi.org/10.1038/ncb2738>
- 514 Heinz, S., Benner, C., Spann, N., Bertolino, E., Lin, Y. C., Laslo, P., ... Glass, C. K. (2010). Simple  
515 combinations of lineage-determining transcription factors prime cis-regulatory elements  
516 required for macrophage and B cell identities. *Molecular Cell*, 38(4), 576–589.  
517 <https://doi.org/10.1016/j.molcel.2010.05.004>
- 518 Isakova, A., Groux, R., Imbeault, M., Rainer, P., Alpern, D., Dainese, R., ... Deplancke, B. (2017).  
519 SMiLE-seq identifies binding motifs of single and dimeric transcription factors. *Nature*  
520 *Methods*, 14(3), 316–322. <https://doi.org/10.1038/nmeth.4143>
- 521 Iwata, A., Durai, V., Tussiwand, R., Briseño, C. G., Wu, X., Grajales-Reyes, G. E., ... Murphy, K. M.  
522 (2017). Quality of TCR signaling determined by differential affinities of enhancers for the  
523 composite BATF-IRF4 transcription factor complex. *Nature Immunology*, 18(5), 563–572.  
524 <https://doi.org/10.1038/ni.3714>
- 525 John, S., Sabo, P. J., Thurman, R. E., Sung, M.-H., Biddie, S. C., Johnson, T. A., ...  
526 Stamatoyannopoulos, J. A. (2011). Chromatin accessibility pre-determines glucocorticoid  
527 receptor binding patterns. *Nature Genetics*, 43(3), 264–268. <https://doi.org/10.1038/ng.759>
- 528 Jolma, A., & Taipale, J. (2011). Methods for Analysis of Transcription Factor DNA-Binding Specificity  
529 In Vitro. *Sub-Cellular Biochemistry*, 52, 155–173. [https://doi.org/10.1007/978-90-481-9069-0\\_7](https://doi.org/10.1007/978-90-481-9069-0_7)
- 530 Jolma, A., Yan, J., Whittington, T., Toivonen, J., Nitta, K. R., Rastas, P., ... Taipale, J. (2013). DNA-  
531 binding specificities of human transcription factors. *Cell*, 152(1–2), 327–339.  
532 <https://doi.org/10.1016/j.cell.2012.12.009>
- 533 Jolma, A., Yin, Y., Nitta, K. R., Dave, K., Popov, A., Taipale, M., ... Taipale, J. (2015). DNA-  
534 dependent formation of transcription factor pairs alters their binding specificity. *Nature*,  
535 527(7578), 384–388. <https://doi.org/10.1038/nature15518>

- 536 Joseph, R., Orlov, Y. L., Huss, M., Sun, W., Kong, S. L., Ukil, L., ... Liu, E. T. (2010). Integrative  
537 model of genomic factors for determining binding site selection by estrogen receptor- $\alpha$ .  
538 *Molecular Systems Biology*, 6, 456. <https://doi.org/10.1038/msb.2010.109>
- 539 Lim, H.-W., Uhlenhaut, N. H., Rauch, A., Weiner, J., Hübner, S., Hübner, N., ... Steger, D. J. (2015).  
540 Genomic redistribution of GR monomers and dimers mediates transcriptional response to  
541 exogenous glucocorticoid in vivo. *Genome Research*, 25(6), 836–844.  
542 <https://doi.org/10.1101/gr.188581.114>
- 543 Luna-Zurita, L., Stirnimann, C. U., Glatt, S., Kaynak, B. L., Thomas, S., Baudin, F., ... Bruneau, B. G.  
544 (2016). Complex Interdependence Regulates Heterotypic Transcription Factor Distribution and  
545 Coordinates Cardiogenesis. *Cell*, 164(5), 999–1014. <https://doi.org/10.1016/j.cell.2016.01.004>
- 546 Machanick, P., & Bailey, T. L. (2011). MEME-ChIP: motif analysis of large DNA datasets.  
547 *Bioinformatics (Oxford, England)*, 27(12), 1696–1697.  
548 <https://doi.org/10.1093/bioinformatics/btr189>
- 549 Mann, I. K., Chatterjee, R., Zhao, J., He, X., Weirauch, M. T., Hughes, T. R., & Vinson, C. (2013). CG  
550 methylated microarrays identify a novel methylated sequence bound by the CEBPB|ATF4  
551 heterodimer that is active in vivo. *Genome Research*, 23(6), 988–997.  
552 <https://doi.org/10.1101/gr.146654.112>
- 553 Mei, S., Qin, Q., Wu, Q., Sun, H., Zheng, R., Zang, C., ... Liu, X. S. (2017). Cistrome Data Browser: a  
554 data portal for ChIP-Seq and chromatin accessibility data in human and mouse. *Nucleic Acids  
555 Research*, 45(D1), D658–D662. <https://doi.org/10.1093/nar/gkw983>
- 556 Miller, M., Shuman, J. D., Sebastian, T., Dauter, Z., & Johnson, P. F. (2003). Structural basis for DNA  
557 recognition by the basic region leucine zipper transcription factor CCAAT/enhancer-binding  
558 protein alpha. *The Journal of Biological Chemistry*, 278(17), 15178–15184.  
559 <https://doi.org/10.1074/jbc.M300417200>
- 560 Mymryk, J. S., & Archer, T. K. (1994). Detection of transcription factor binding in vivo using lambda  
561 exonuclease. *Nucleic Acids Research*, 22(20), 4344–4345.



- 562 Odom, D. T. (2011). Identification of Transcription Factor-DNA Interactions In Vivo. *Sub-Cellular*  
563 *Biochemistry*, 52, 175–191. [https://doi.org/10.1007/978-90-481-9069-0\\_8](https://doi.org/10.1007/978-90-481-9069-0_8)
- 564 Orenstein, Y., & Shamir, R. (2017). Modeling protein-DNA binding via high-throughput in vitro  
565 technologies. *Briefings in Functional Genomics*, 16(3), 171–180.  
566 <https://doi.org/10.1093/bfpg/elw030>
- 567 Reinke, A. W., Baek, J., Ashenberg, O., & Keating, A. E. (2013). Networks of bZIP protein-protein  
568 interactions diversified over a billion years of evolution. *Science (New York, N.Y.)*, 340(6133),  
569 730–734. <https://doi.org/10.1126/science.1233465>
- 570 Rhee, H. S., & Pugh, B. F. (2011). Comprehensive genome-wide protein-DNA interactions detected at  
571 single-nucleotide resolution. *Cell*, 147(6), 1408–1419.  
572 <https://doi.org/10.1016/j.cell.2011.11.013>
- 573 Rodríguez-Martínez, J. A., Reinke, A. W., Bhimsaria, D., Keating, A. E., & Ansari, A. Z. (2017).  
574 Combinatorial bZIP dimers display complex DNA-binding specificity landscapes. *ELife*, 6.  
575 <https://doi.org/10.7554/eLife.19272>
- 576 Rosen, E. D., Hsu, C.-H., Wang, X., Sakai, S., Freeman, M. W., Gonzalez, F. J., & Spiegelman, B. M.  
577 (2002). C/EBPalpha induces adipogenesis through PPARgamma: a unified pathway. *Genes &*  
578 *Development*, 16(1), 22–26. <https://doi.org/10.1101/gad.948702>
- 579 Roven, C., & Bussemaker, H. J. (2003). REDUCE: An online tool for inferring cis-regulatory elements  
580 and transcriptional module activities from microarray data. *Nucleic Acids Research*, 31(13),  
581 3487–3490.
- 582 Schmidt, D., Wilson, M. D., Ballester, B., Schwalie, P. C., Brown, G. D., Marshall, A., ... Odom, D. T.  
583 (2010). Five-vertebrate ChIP-seq reveals the evolutionary dynamics of transcription factor  
584 binding. *Science (New York, N.Y.)*, 328(5981), 1036–1040.  
585 <https://doi.org/10.1126/science.1186176>
- 586 Schumacher, M. A., Goodman, R. H., & Brennan, R. G. (2000). The structure of a CREB  
587 bZIP.somatostatin CRE complex reveals the basis for selective dimerization and divalent



- 588 cation-enhanced DNA binding. *The Journal of Biological Chemistry*, 275(45), 35242–35247.  
589 <https://doi.org/10.1074/jbc.M007293200>
- 590 Serandour, A. A., Brown, G. D., Cohen, J. D., & Carroll, J. S. (2013). Development of an Illumina-  
591 based ChIP-exonuclease method provides insight into FoxA1-DNA binding properties.  
592 *Genome Biology*, 14(12), R147. <https://doi.org/10.1186/gb-2013-14-12-r147>
- 593 Shlyueva, D., Stampfel, G., & Stark, A. (2014). Transcriptional enhancers: from properties to genome-  
594 wide predictions. *Nature Reviews. Genetics*, 15(4), 272–286. <https://doi.org/10.1038/nrg3682>
- 595 Spitz, F., & Furlong, E. E. M. (2012). Transcription factors: from enhancer binding to developmental  
596 control. *Nature Reviews. Genetics*, 13(9), 613–626. <https://doi.org/10.1038/nrg3207>
- 597 Starick, S. R., Ibn-Salem, J., Jurk, M., Hernandez, C., Love, M. I., Chung, H.-R., ... Meijnsing, S. H.  
598 (2015). ChIP-exo signal associated with DNA-binding motifs provides insight into the genomic  
599 binding of the glucocorticoid receptor and cooperating transcription factors. *Genome*  
600 *Research*, 25(6), 825–835. <https://doi.org/10.1101/gr.185157.114>
- 601 Stormo, G. D., & Zhao, Y. (2010). Determining the specificity of protein-DNA interactions. *Nature*  
602 *Reviews. Genetics*, 11(11), 751–760. <https://doi.org/10.1038/nrg2845>
- 603 Tsukada, J., Yoshida, Y., Kominato, Y., & Auron, P. E. (2011). The CCAAT/enhancer (C/EBP) family  
604 of basic-leucine zipper (bZIP) transcription factors is a multifaceted highly-regulated system for  
605 gene regulation. *Cytokine*, 54(1), 6–19. <https://doi.org/10.1016/j.cyto.2010.12.019>
- 606 Vockley, C. M., Barrera, A., & Reddy, T. E. (2017). Decoding the role of regulatory element  
607 polymorphisms in complex disease. *Current Opinion in Genetics & Development*, 43, 38–45.  
608 <https://doi.org/10.1016/j.gde.2016.10.007>
- 609 Wang, J., Zhuang, J., Iyer, S., Lin, X., Whitfield, T. W., Greven, M. C., ... Weng, Z. (2012). Sequence  
610 features and chromatin structure around the genomic regions bound by 119 human  
611 transcription factors. *Genome Research*, 22(9), 1798–1812.  
612 <https://doi.org/10.1101/gr.139105.112>

613 Weirauch, M. T., Yang, A., Albu, M., Cote, A. G., Montenegro-Montero, A., Drewe, P., ... Hughes, T.  
614 R. (2014). Determination and inference of eukaryotic transcription factor sequence specificity.  
615 *Cell*, 158(6), 1431–1443. <https://doi.org/10.1016/j.cell.2014.08.009>  
616 Yin, Y., Morgunova, E., Jolma, A., Kaasinen, E., Sahu, B., Khund-Sayeed, S., ... Taipale, J. (2017).  
617 Impact of cytosine methylation on DNA binding specificities of human transcription factors.  
618 *Science (New York, N.Y.)*, 356(6337). <https://doi.org/10.1126/science.aaj2239>  
619 Yue, F., Cheng, Y., Breschi, A., Vierstra, J., Wu, W., Ryba, T., ... Mouse ENCODE Consortium.  
620 (2014). A comparative encyclopedia of DNA elements in the mouse genome. *Nature*,  
621 515(7527), 355–364. <https://doi.org/10.1038/nature13992>  
622  
623

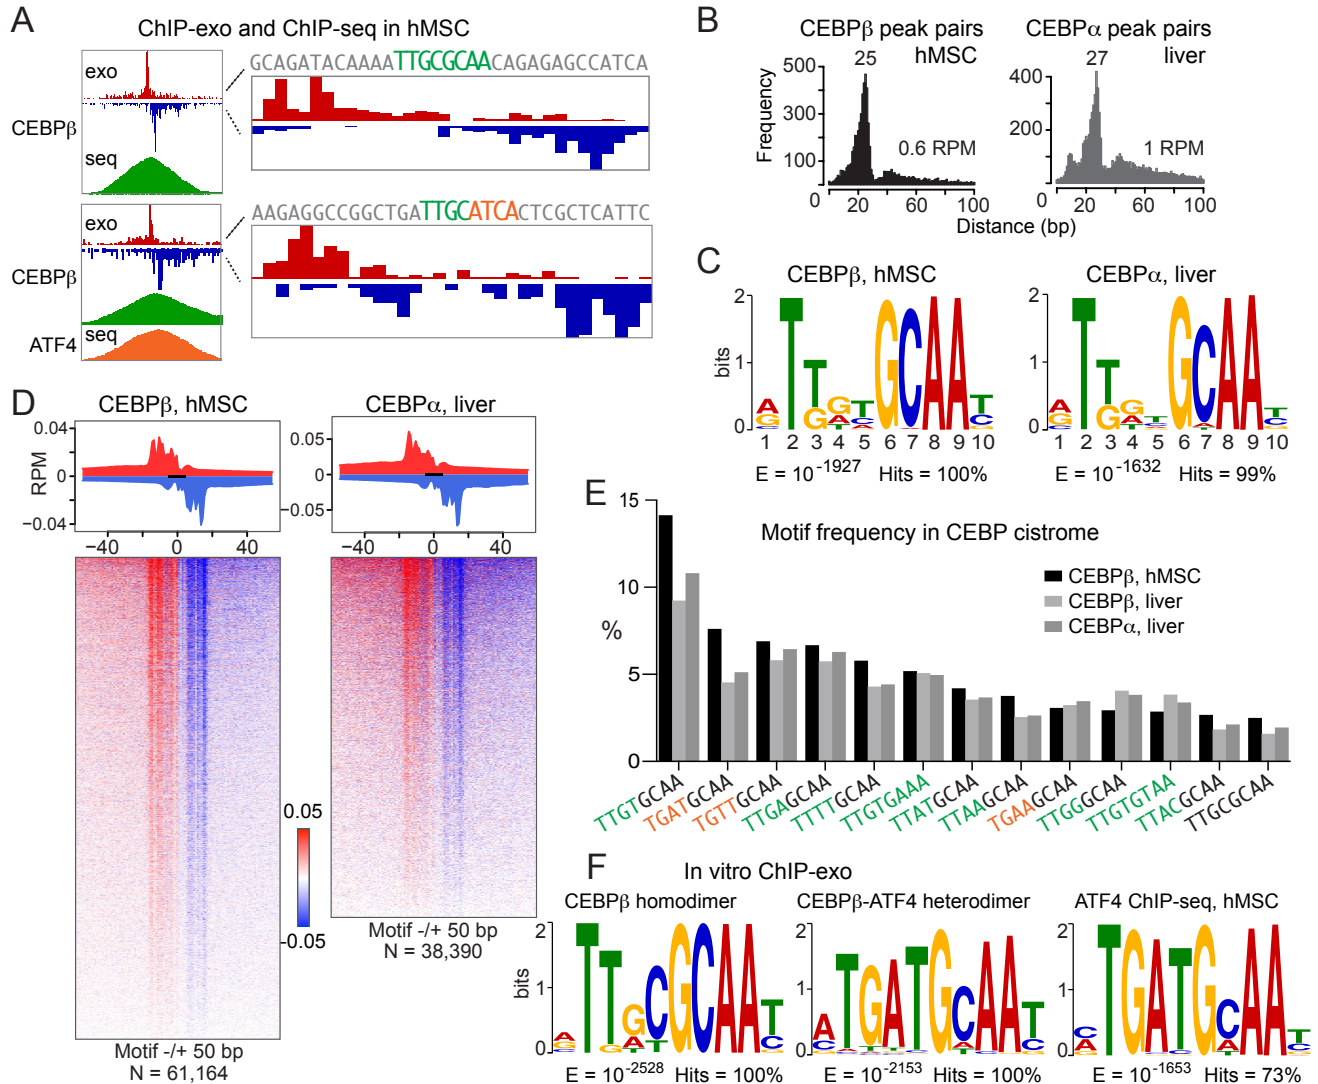

624  
625  
626  
627  
628  
629  
630  
631  
632  
633  
634  
635  
636  
637  
638  
639

**Figure 1. CEBP proteins occupy multiple sequence motifs on the native genome. (A)** Comparison of ChIP-exo and ChIP-seq results for CEBP $\beta$  in hMSCs. Left, an opposite-stranded peak pair from ChIP-exo resides near the center of the ChIP-seq peak for either a homodimer-binding site (top) or a heterodimer site with ATF4 (bottom). Right, closer inspection reveals canonical DNA motifs for CEBP $\beta$  (green) or CEBP $\beta$ -ATF4 (green-orange) between the ChIP-exo peak pairs. Red and blue indicate the 5' ends of the forward- and reverse-stranded sequence tags, respectively. **(B)** Distance distributions for the spacing between opposite-stranded peak pairs. Predominant distances are indicated. **(C)** MEME de novo motif analyses of the 1000-top-ranked ChIP-exo peak pairs spaced 15-30 bp apart. **(D)** Average profiles (top) and density heat maps (bottom) of the ChIP-exo sequence tags at CEBP-binding sites in hMSCs or liver. **(E)** Top-ranked core motifs at CEBP $\beta$  peak pairs in hMSCs compared with CEBPs in liver. The CEBP half site, GCAA, is uncolored; degenerate half site is green (CEBP related) or orange (bZip related). **(F)** MEME de novo motif analyses of the 1000-top-ranked peak pairs spaced 10-30 bp apart are shown for the CEBP $\beta$  homodimer and CEBP $\beta$ -ATF4 heterodimer. Motif analysis from ATF4 ChIP-seq in hMSCs is shown for comparison.

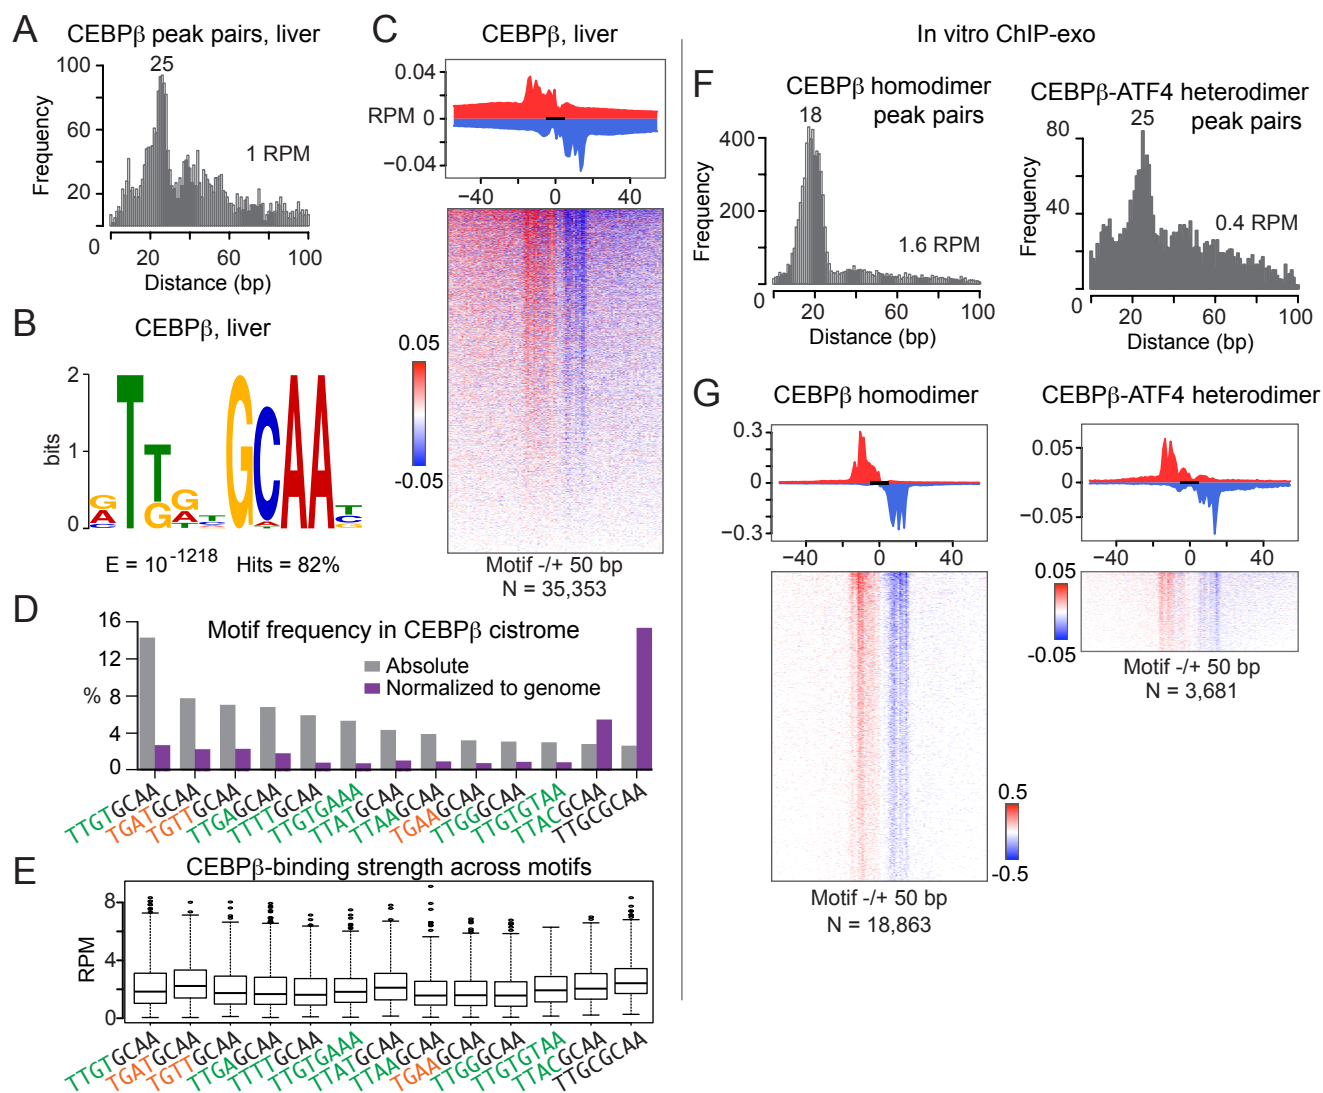

640

641

642

643

644

645

646

647

648

649

650

651

652

653

**Figure 1-figure supplement 1. In vivo and in vitro ChIP-exo analyses of CEBP $\beta$ .** (A) Distance distribution for the spacing between opposite-stranded peak pairs for CEBP $\beta$  in liver. The predominant distance is indicated. (B) MEME de novo motif analysis of the 1000-top-ranked peak pairs spaced 15-30 bp apart. (C) Average profile (top) and density heat map (bottom) of the ChIP-exo sequence tags at CEBP $\beta$ -binding sites in liver. (D) Frequencies of the top-ranked core motifs for CEBP $\beta$  in hMSCs with and without normalization to the genomic frequency for each motif. The CEBP half site, GCAA, is uncolored; degenerate half site is green (CEBP related) or orange (bZip related). (E) Box plots showing CEBP $\beta$ -binding strength (ChIP-seq reads per million, RPM) in hMSCs at the top-ranked core motifs. (F) Distance distributions for the spacing between opposite-stranded peak pairs from an in vitro cistromics assay modeled after ChIP-exo. The CEBP $\beta$  homodimer and CEBP $\beta$ -ATF4 heterodimer were immunoprecipitated by CEBP $\beta$  and ATF4 antibodies, respectively. Predominant distances are indicated. (G) Average profiles (top) and density heat maps (bottom) of the in vitro ChIP-exo sequence tags at binding sites for the CEBP $\beta$  homodimer and heterodimer.

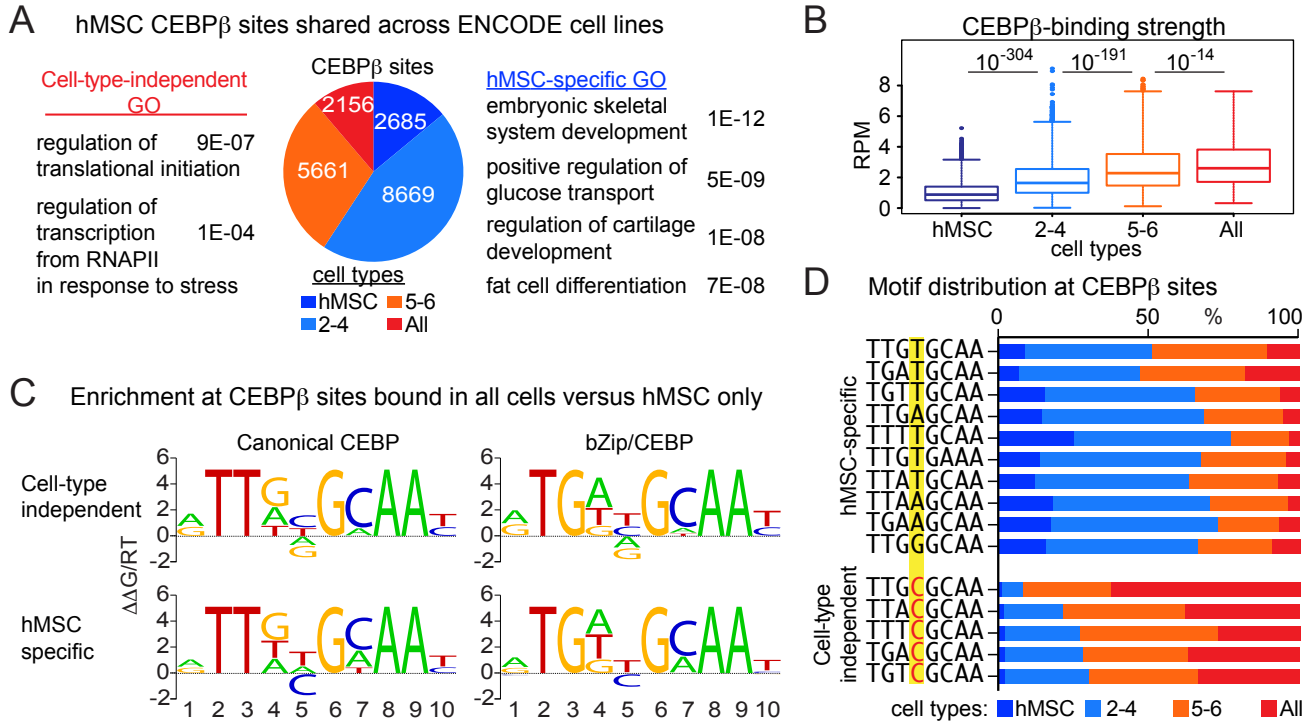

654

655

656

657

658

659

660

661

662

663

664

665

666

**Figure 2. Selective versus widespread occupancy across cell types for distinct CEBP $\beta$  motifs.** (A) Pie chart comparing CEBP $\beta$  occupancy across 7 human cell types (hMSC + 6 ENCODE cell lines) at 19,171 ChIP-exo-annotated CEBP $\beta$  sites from hMSCs. ENCODE ChIP-seq peak calls determined occupancy in cells other than hMSCs. Top-ranked gene ontology (GO) terms for sites bound in all cells (cell-type independent) or in hMSCs only (hMSC specific) are shown. (B) Box plots interrogating CEBP $\beta$ -binding strength (ChIP-seq reads per million, RPM) in hMSCs at the classes of sites defined in A. Wilcoxon rank sum test used to compare adjacent classes. (C) De novo motif analyses showing de-enriched bases that differ between cell-type-independent and hMSC-specific sites. Top-ranked sequence was subdivided into the canonical and hybrid CEBP motifs. (D) Individual 8-mers enriched at cell-type-independent or hMSC-specific sites for CEBP $\beta$  were examined to display occupancy across the 7 human cell types. Base position differing between the two classes of sites is highlighted.

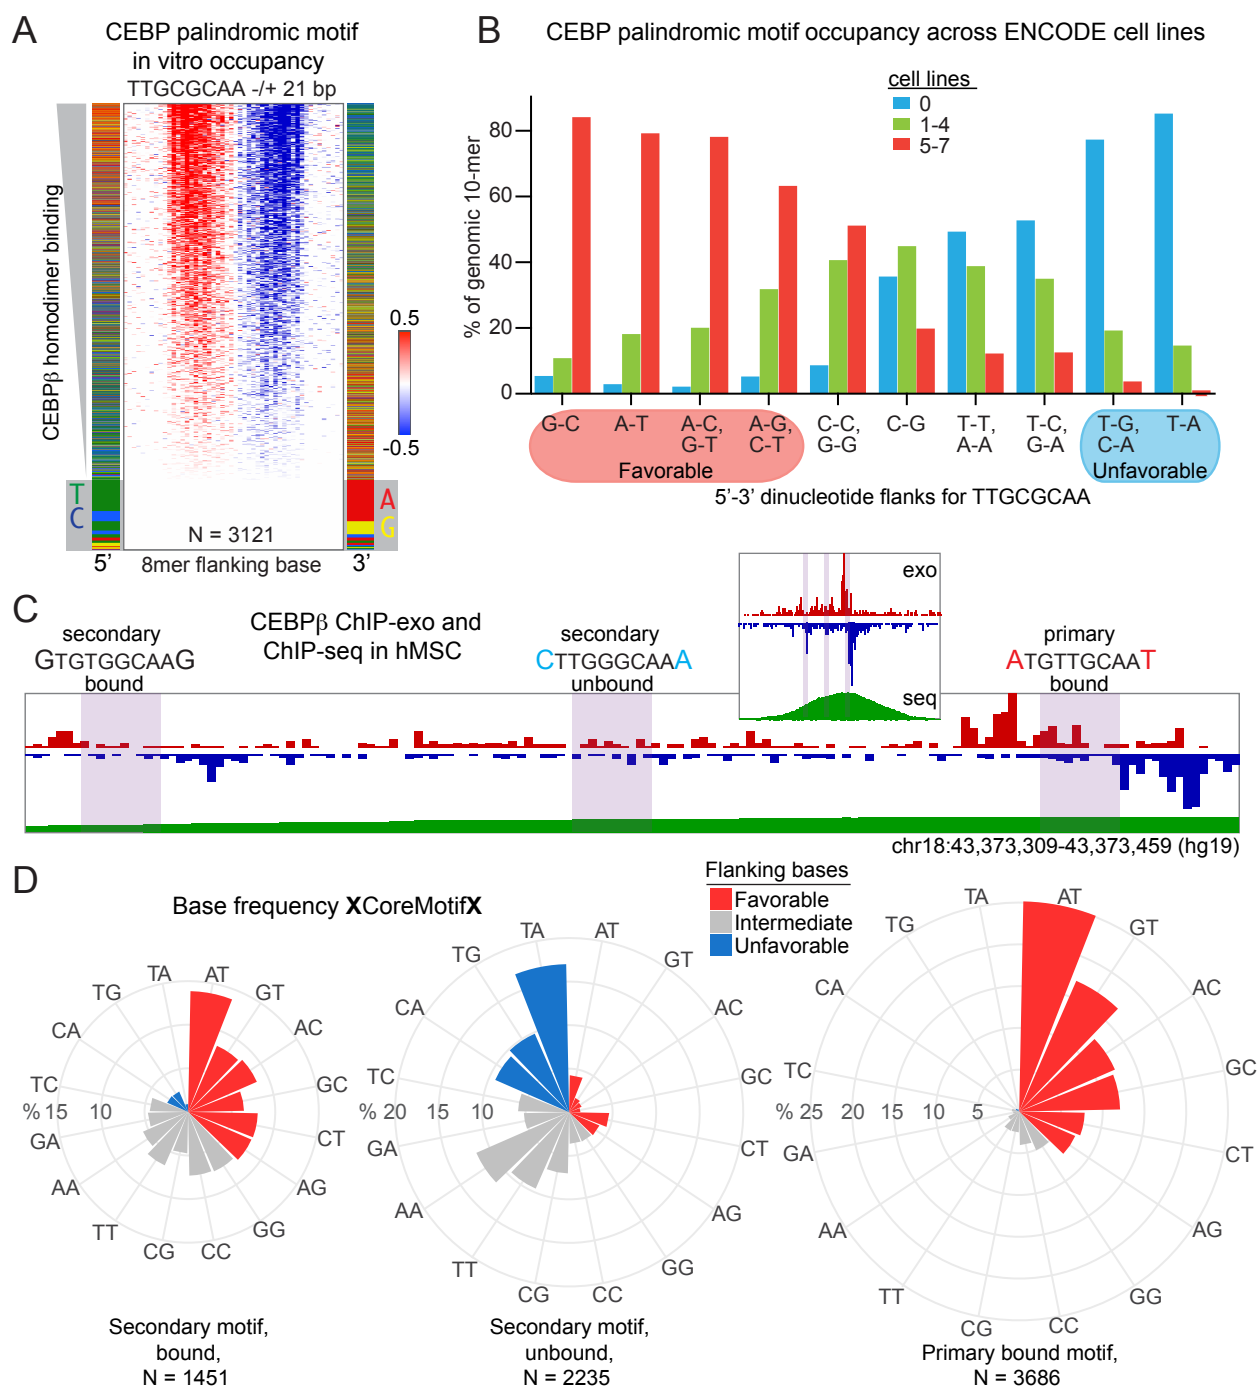

667

668 **Figure 3. Bases directly flanking the core CEBP 8-mer affect occupancy.** (A) Density heat map of  
 669 the in vitro ChIP-exo reads for the CEBP $\beta$  homodimer at all canonical palindromic 8-mers with  
 670 mappable sequence. Binding strength is ordered from top to bottom. Color charts show the base  
 671 identity at the first position next to the 8-mer on the 5' and 3' ends. Grey boxes indicate sites without  
 672 detectable ChIP-exo reads. (B) Histogram interrogating relationship between flanking bases and  
 673 CEBP $\beta$  occupancy at all canonical palindromic 8-mers across 7 cell types. Equivalent flanking pairs  
 674 (5'-3') are grouped together. ENCODE ChIP-seq peak calls are plotted. Favorable flanks associate  
 675 with occupancy in most cell types at most locations. Unfavorable flanks are not bound in any cell type



676 at most locations. **(C)** CEBP $\beta$  ChIP-exo reads at a ChIP-seq peak (insert) from hMSCs with 3 CEBP  
677 motifs of the form TKnnGCAA. Purple shading indicates motif locations. Binding to the primary motif  
678 (right) is indicated by co-localization with an opposite-stranded peak pair. The secondary motifs co-  
679 localize with either a weaker peak pair having too few reads to meet binding cutoffs (left) or  
680 background reads (center). Flanking bases (larger font) are indicated as favorable (red) or  
681 unfavorable (blue) based on the findings from the palindromic 8-mer. **(D)**. Polar bar graphs indicating  
682 the frequency of each pair of bases (5' and 3') flanking a generic CEBP motif at primary and  
683 secondary motifs. Comparison of the frequencies for favorable, intermediate and unfavorable flanks  
684 between the secondary bound versus unbound motifs are highly statistically significant ( $p < E-13$  by  
685 hypergeometric distribution).

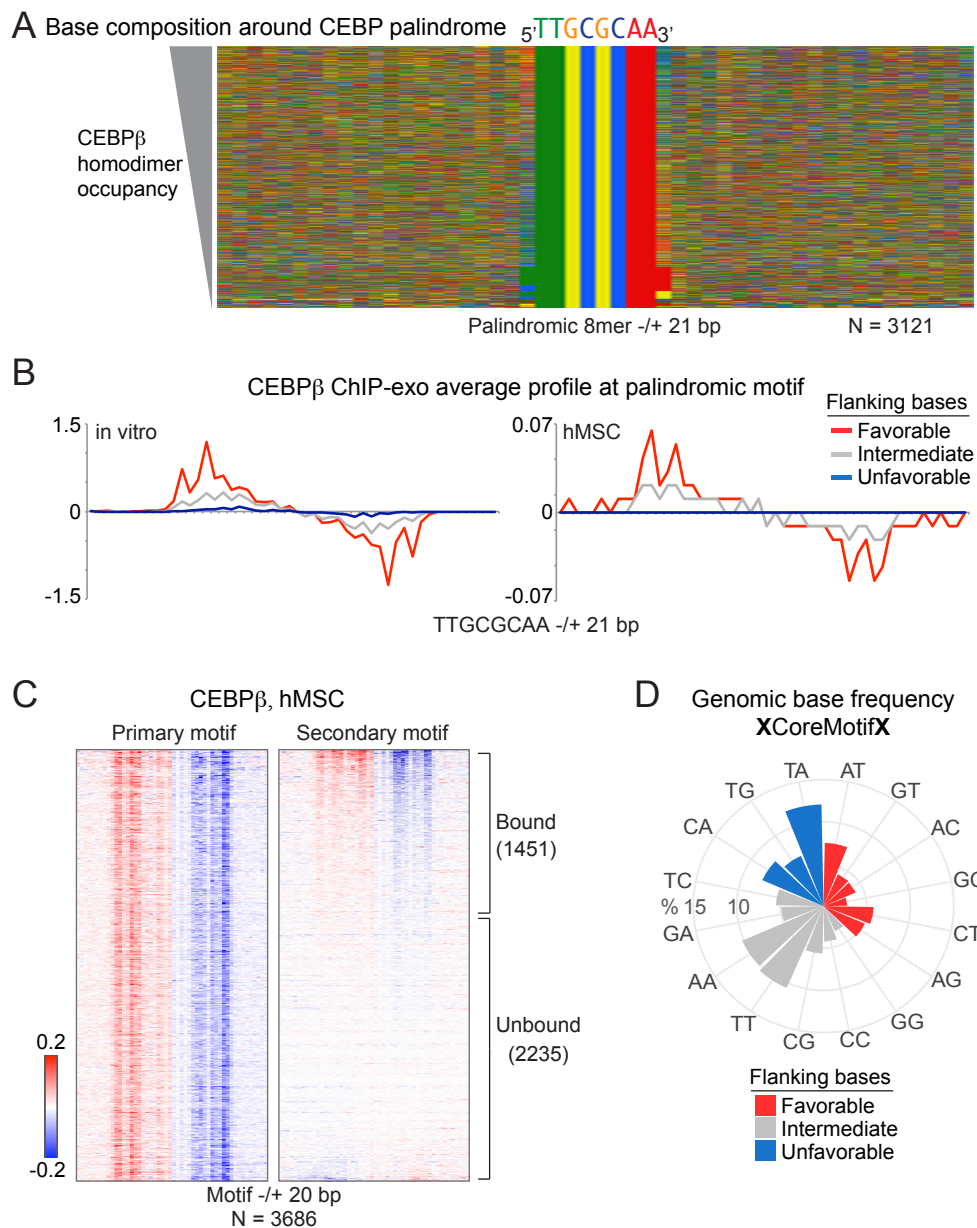

686

687

**Figure 3-figure supplement 1. Flanking bases for the core CEBP 8-mer regulate TF binding.** (A)

688 Sequence enrichment beyond the palindromic 8-mer is restricted to a single base on either end of the

689 motif. Color chart corresponding to the heat map of figure 3A showing the base composition of the

690 surrounding region for all canonical palindromic 8-mers with mappable sequence. (B) Average profiles

691 of the CEBP $\beta$  ChIP-exo sequence tags at the canonical palindromic motif generated from in vitro (left)

692 and hMSC (right) studies. (C) Density heat maps of the CEBP $\beta$  ChIP-exo reads at the primary and

693 secondary motifs for hMSC ChIP-seq peaks that carry more than one instance of the frequently

694 occupied CEBP core 8-mers. Ranking of motifs based on ChIP-exo signal shows 557 sites with

695 opposite-stranded peak pairs that define secondary bound motifs. Reads for the corresponding

696 primary motif within each ChIP-seq peak are shown at the left. (D) Polar bar graph indicating the

697 frequency of each pair of bases (5' and 3') flanking the top CEBP motif variants at all sites in the

698

human genome.



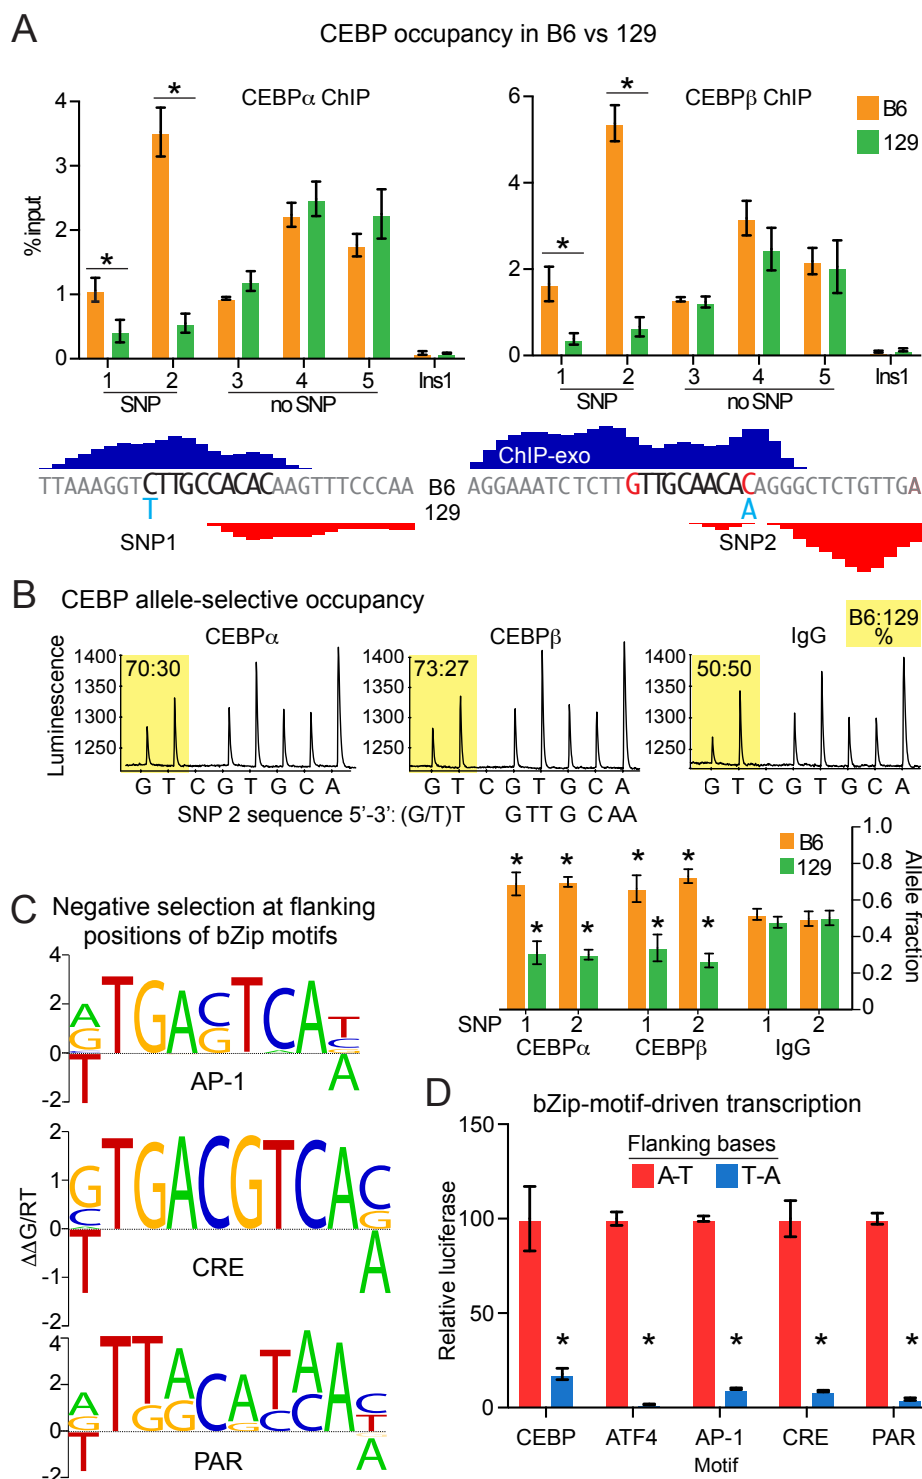

699

700

701

702

703

704

**Figure 4. Bases directly flanking core bZip motifs regulate transcription.** (A) CEBP ChIP in liver tissue isolated from B6 and 129 mice interrogating binding sites with and without SNPs in the bases flanking the core CEBP 8-mer. ChIP-exo tracks (bottom) show location of SNP relative to core 8-mer and opposite-stranded peak pairs. Ins1, non-specific control site. Error bars depict SEM from 5 biological replicates. \*, denotes  $p < 0.05$ , Student's  $t$ -test comparison of B6 with 129. (B)

705 Pyrosequencing of CEBP $\alpha$ , CEBP $\beta$  and IgG ChIP DNA prepared from liver tissue of B6x129 F1 mice.  
706 Chromatograms show raw data for SNP2. Note that these data report the opposite DNA strand shown  
707 in A. Bar plot (lower right) reports results for SNPs 1 and 2 with error bars depicting SEM from 5  
708 biological replicates. \*, denotes  $p < 0.05$ , Student's  $t$ -test comparison of CEBP $\alpha$  or CEBP $\beta$  with IgG.  
709 **(C)** Motif analyses of AP-1, CREB1 and NFIL3 ChIP-seq data. Top-ranked motif is shown for each  
710 emphasizing de-enriched bases in the 5' and 3' positions flanking the core sequences. Negative  
711 selection of bases within the cores is not shown. **(D)** Core bZip motifs were assembled into repeats of  
712 four and assayed by a luciferase reporter in HEK293T cells. Flanking bases (X-X) for the CEBP  
713 (XTTGTGCAAX), ATF4 (XTGATGCAAX), AP-1 (XTGACTCAX), CRE (XTGACGTCAX) and PAR  
714 (XTTACGTAAX) motifs were either favorable (A-T) or unfavorable (T-A) for TF occupancy. Error bars  
715 depict SEM from 3 replicates. \*, denotes  $p < 0.01$ , Student's  $t$ -test comparison of favorable with  
716 unfavorable flanks for each motif.

717 **Supplemental Table 1. Oligonucleotides Used in the Study.** List contains the templates used to  
718 subclone motif multimers for luciferase assays and PCR primers used for ChIP.  
719

720 Luciferase templates

721 4xAT AP-1  
722 ctcgagtaatacgcactcactatagggactcgATGACTCATtctagatcactatactcgATGACTCATtctagatcactata  
723 ctcgATGACTCATtctagatcactatactcgATGACTCATtctagatcactactgcagatcgtgagttatgagatct  
724 4xTA AP-1  
725 ctcgagtaatacgcactcactatagggactcgTTGACTCAAAtctagatcactatactcgTTGACTCAAAtctagatcactata  
726 ctcgTTGACTCAAAtctagatcactatactcgTTGACTCAAAtctagatcactactgcagatcgtgagttatgagatct  
727 4xAT ATF4  
728 ctcgagtaatacgcactcactatagggactcgATTGCATCATtctagatcactatactcgATTGCATCATtctagatcacta  
729 tactcgATTGCATCATtctagatcactatactcgATTGCATCATtctagatcactactgcagatcgtgagttatgagatct  
730 4xTA ATF4  
731 ctcgagtaatacgcactcactatagggactcgTTTGCATCAAAtctagatcactatactcgTTTGCATCAAAtctagatcacta  
732 tactcgTTTGCATCAAAtctagatcactatactcgTTTGCATCAAAtctagatcactactgcagatcgtgagttatgagatct  
733 4xAT CEBP  
734 ctcgagtaatacgcactcactatagggactcgATTGCACAATtctagatcactatactcgATTGCACAATtctagatcacta  
735 tactcgATTGCACAATtctagatcactatactcgATTGCACAATtctagatcactactgcagatcgtgagttatgagatct  
736 4xTA CEBP  
737 ctcgagtaatacgcactcactatagggactcgTTTGACAAAAtctagatcactatactcgTTTGACAAAAtctagatcacta  
738 tactcgTTTGACAAAAtctagatcactatactcgTTTGACAAAAtctagatcactactgcagatcgtgagttatgagatct  
739 4xAT CRE  
740 ctcgagtaatacgcactcactatagggactcgATGACGTCATtctagatcactatactcgATGACGTCATtctagatcacta  
741 tactcgATGACGTCATtctagatcactatactcgATGACGTCATtctagatcactactgcagatcgtgagttatgagatct  
742 4xTA CRE  
743 ctcgagtaatacgcactcactatagggactcgTTGACGTCAAAtctagatcactatactcgTTGACGTCAAAtctagatcacta  
744 tactcgTTGACGTCAAAtctagatcactatactcgTTGACGTCAAAtctagatcactactgcagatcgtgagttatgagatct  
745 4xAT PAR  
746 ctcgagtaatacgcactcactatagggactcgATTACGTAATtctagatcactatactcgATTACGTAATtctagatcacta  
747 tactcgATTACGTAATtctagatcactatactcgATTACGTAATtctagatcactactgcagatcgtgagttatgagatct  
748 4xTA PAR  
749 ctcgagtaatacgcactcactatagggactcgTTTACGTAATtctagatcactatactcgTTTACGTAATtctagatcacta  
750 tactcgTTTACGTAATtctagatcactatactcgTTTACGTAATtctagatcactactgcagatcgtgagttatgagatct

751

752 PCR primers

|                               |                                 |
|-------------------------------|---------------------------------|
| 753 4xmer FOR                 | agcactcgagtaatacgcactcactataggg |
| 754 4xmer REV                 | atatagatctcataactcacgatctgcag   |
| 755 INS1 F                    | ggaccacaagtggaacaac             |
| 756 INS1 R                    | gtgcagcactgatccacaat            |
| 757 CEBP ChIP site 1 SNP F    | catcatcatcaacaacaacaaca         |
| 758 CEBP ChIP site 1 SNP R    | gcagagagcaactttgtgga            |
| 759 CEBP ChIP site 2 SNP F    | gagtgggtgtttccagaggcta          |
| 760 CEBP ChIP site 2 SNP R    | tgagccatctctccagcttt            |
| 761 CEBP ChIP site 3 no SNP F | ctctccctctttgtcgcatt            |
| 762 CEBP ChIP site 3 no SNP R | tccgacattttgagacatc             |
| 763 CEBP ChIP site 4 no SNP F | cccagcttgctcaactaagg            |
| 764 CEBP ChIP site 4 no SNP R | accacatccatggtggagag            |
| 765 CEBP ChIP site 5 no SNP F | tcttccagggaaatgctgag            |
| 766 CEBP ChIP site 5 no SNP R | aggtgattgcaggagattgg            |
| 767 CEBP SNP 1 pyro F-bio     | tggcccagaaatattggcttagag        |
| 768 CEBP SNP 2 pyro F-bio     | gctgcaggcgggtcaaatg             |
| 769 pyro seq SNP1             | gaaacttgtgtggcaa                |
| 770 pyro seq SNP2             | ggtcaacagagccct                 |
